# Supplementary material
Source: ML conference proceedings conference paper supplement (https://proceedings.neurips.cc/paper_files/paper/2010/hash/9cfdf10e8fc047a44b08ed031e1f0ed1-Abstract.html)
Supplement: Supplementary file 1 [file 9cfdf10e8fc047a44b08ed031e1f0ed1-Supplemental.zip]

# Online Classification with Specificity Constraints

## Supplementary Material

October 26, 2010

### 1 Properties of the Relaxed Best-Response Envelope

Recall that the scalar-relaxed best-response envelope (SR-BE) is given by

$$r_\alpha^{\text{SR}}(q) \triangleq q(1) \max \{0, \beta^*(q) - \alpha\}, \quad (1)$$

where

$$\beta^*(q) \triangleq \max_{a \in \{1, \dots, m\}} \{\beta_{tp}(q; a)\}, \quad (2)$$

is the optimal (unconstrained) tp-rate in hindsight under distribution  $q$ . Also, the CBE is

$$r_\gamma^*(q) = q(1)\beta_\gamma^*(q), \quad (3)$$

where

$$\beta_\gamma^*(q) \triangleq \max_{p \in \Delta(\mathcal{A})} \left\{ \sum_{a \in \mathcal{A}} p(a) \beta_{tp}(q; a) : \text{ so that } \sum_{a \in \mathcal{A}} p(a) \beta_{fp}(q; a) \leq \gamma \right\}, \quad (4)$$

is the optimal constrained tp-rate in hindsight under distribution  $q$ .

We prove the following lemmas, which state the properties of the SR-BE. The first one is trivial.

**Lemma 1.1.**

1. For every  $\alpha \geq 0$ ,  $r_\alpha^{\text{SR}}$  is a convex continuous function.
2. For every  $\alpha \geq 0$ , we have that  $0 \leq r_\alpha^{\text{SR}}(q) \leq \text{conv}(r_\gamma^*)(q)$  for all  $q \in \Delta(\mathcal{Z})$ .

*Proof.* Part 1 of the Lemma follows since  $r_\alpha^{\text{SR}}$  is a maximum of linear functions (which is convex and continuous). The lower bound of Part 2 is trivial by definition of  $r_\alpha^{\text{SR}}$ . The upper bound follows by the fact that  $r_\alpha^{\text{SR}}$  is a convex function which is nowhere larger than  $r_\gamma^*$ .  $\square$

In particular, this Lemma states that the SR-BE is always dominated from above by the convex hull of the CBE. Recall, however, that the motivation for using the former is computational.

The next lemma shows that the SR-BE is strictly above the value of the constrained game at some point, unless the game is in some sense trivial. Hence, it do provide a performance improvement over the constrained min-max solution. Recall that the value of the constrained game in our case is

$$\begin{aligned} v_\Gamma &\triangleq \min_{q \in \Delta(\mathcal{Z})} r_\gamma^*(q) \\ &= \min_{q \in \Delta(\mathcal{Z})} \left\{ q(1) \max_{p \in \Delta(\mathcal{A})} \left\{ \sum_{a \in \mathcal{A}} p(a) \beta_{tp}(q; a) : \text{ so that } \sum_{a \in \mathcal{A}} p(a) \beta_{fp}(q; a) \leq \gamma \right\} \right\} = 0. \end{aligned}$$

**Lemma 1.2.** *Suppose that*

$$\alpha^* = \max_{q \in \Delta(\mathcal{Z})} (\beta^*(q) - \beta_\gamma^*(q)) < 1. \quad (5)$$

*Then, there exists  $q \in \Delta(\mathcal{Z})$  such that  $r_{\alpha^*}^{\text{SR}}(q) > v_\gamma = 0$ .*

*Proof.* Note that under condition (5), we have that there exists  $q \in \Delta(\mathcal{Z})$  with  $q(1) > 0$  such that

$$\beta^*(q) = 1 > \max_{q \in \Delta(\mathcal{Z})} (\beta^*(q) - \beta_\gamma^*(q)) = \alpha^*,$$

implying that for this  $q$

$$r_{\alpha^*}^{\text{SR}}(q) = q(1)(\beta^*(q) - \alpha^*) > 0.$$

□

We note that the condition of Lemma 1.2 is satisfied, unless the constrained optimal tp-rate  $\beta_\gamma^*(q)$  is zero at some  $q$  for which the unconstrained optimal tp-rate is 1.

## 2 Proof of Theorem 5.1

Fix  $\alpha \geq \alpha^*$ . We use approachability theory [2] (presented in detail in Section 5) to prove this theorem. In particular, we consider an extension of Hart and Mas-Colell's vector-valued game formulation [3] (see Section 5.3), with the following vector-valued payoff of the agent at time  $n$ :

$$m_n \triangleq (\{R_n^\alpha(a)\}_{a \in \mathcal{A}}, L_n) \in \mathbb{R}^{|\mathcal{A}|+1},$$

where

$$\begin{aligned} R_k^\alpha(a) &\triangleq [f_k(a) - f_k(a_k) - \alpha] \mathbb{I}\{b_k = 1\}, \quad a \in \mathcal{A}, \\ L_k &\triangleq c_\gamma(a_k, z_k), \end{aligned} \quad (6)$$

The average vector-valued payoff at time  $n$  is then

$$\bar{m}_n = \left( \{ \bar{R}_n^\alpha(a) \}_{a \in \mathcal{A}}, \bar{L}_n \right), \quad (7)$$

where

$$\bar{R}_n^\alpha(a) = \bar{q}_n(1) [\beta_{tp}(\bar{q}_n; a) - \bar{\beta}_{tp}(n) - \alpha], \quad a \in \mathcal{A}; \quad \bar{L}_n = \bar{q}_n(0) [\bar{\beta}_{fp}(n) - \gamma]. \quad (8)$$

Now, consider  $S = \mathbb{R}_-^{|\mathcal{A}|+1} \triangleq \{u \in \mathbb{R}^{|\mathcal{A}|+1} : u \leq 0\}$ , which is the non-positive orthant of  $\mathbb{R}^{|\mathcal{A}|+1}$ . The set  $S$  is convex, and we now show that it is approachable. For this, let

$$m(p, q) = (\{q(1) [\beta_{tp}(q; a) - \alpha] - r(p, q)\}_{a \in \mathcal{A}}, c_\gamma(p, q)) \quad (9)$$

denote the expected vector-valued payoff under the pair of mixed actions  $(p, q)$ . We need to show that for every  $q \in \Delta(\mathcal{Z})$  there exists a  $p \in \Delta(\mathcal{A})$  such that  $m(p, q) \in S$ , which is a sufficient condition for approachability of convex sets (see Theorem 5.1). Fix  $q \in \Delta(\mathcal{Z})$ . First note that, by our assumption that the constraints can always be satisfied, there exists a  $p^* \in \Delta(\mathcal{A})$  such that  $c_\gamma(p^*, q) \leq 0$  and

$$\begin{aligned} r(p^*, q) &= r_\gamma^*(q) \\ &= q(1) \beta_\gamma^*(q) \\ &\geq q(1) (\beta^*(q) - \max_{q \in \Delta(\mathcal{Z})} [\beta^*(q) - \beta_\gamma^*(q)]) \\ &\geq q(1) (\beta^*(q) - \alpha) \\ &\geq q(1) (\beta_{tp}(q; a) - \alpha), \quad \forall a \in \mathcal{A}, \end{aligned}$$

where the second inequality follows by the assumption that

$$\alpha \geq \alpha^* \triangleq \max_{q \in \Delta(\mathcal{Z})} (\beta^*(q) - \beta_\gamma^*(q))$$

and the third inequality holds by (2). Thus  $m(p^*, q) \in S$ , and  $S$  is approachable. Also note that the corresponding approachability algorithm attains  $r_\alpha^{\text{SR}}$ , since the approachability of  $\bar{m}_n$  to  $S$  implies that (almost surely, for every strategy of the opponent)

$$\limsup_{n \rightarrow 0} \bar{R}_n^\alpha(a) \leq 0, \quad \forall a \in \mathcal{A}$$

and

$$\limsup_{n \rightarrow 0} \bar{L}_n \leq 0,$$

which in turn implies by (8) that

$$\limsup_{n \rightarrow 0} \{ \bar{q}_n(1) [\beta_{tp}(\bar{q}_n; a) - \bar{\beta}_{tp}(n) - \alpha] \} \leq 0, \quad \forall a \in \mathcal{A}$$

$$\limsup_{n \rightarrow 0} \{ \bar{q}_n(0) [\bar{\beta}_{fp}(n) - \gamma] \} \leq 0.$$

It remains to develop a more explicit version of this approachability algorithm and show that it coincides with the CRM algorithm. Since  $S$  is approachable, Blackwell's approachability theorem ensures that for every  $u \in \mathbb{R}^{|\mathcal{A}|+1}$  there exists a  $p \in \Delta(\mathcal{A})$  such that

$$u \cdot m(p, z) \leq \sup \{u \cdot s : u \in S\}, \quad \forall z \in \mathcal{Z};$$

see [4] and Corollary 5.1 in Appendix 5. Moreover, an approaching strategy is to choose at stage  $n$  a mixed action  $p$  which corresponds to  $u = \bar{m}_{n-1} - P_S(\bar{m}_{n-1})$ , where  $P_S(v)$  is the projection of  $v$  to  $S$  in the Euclidean distance. In our case,  $S$  is the non positive orthant and therefore  $P_S(\bar{m}_{n-1}) = [\bar{m}_{n-1}]_-$ , implying that  $u = [\bar{m}_{n-1}]_+ \in \mathbb{R}_+^{|\mathcal{A}|+1}$ . As a result,  $\sup \{u \cdot s : s \in S\} = 0$ . To summarize, an approaching strategy is to choose at time  $n$  a mixed action  $p$  which satisfies:

$$[\bar{m}_{n-1}]_+ \cdot m(p, z) \leq 0, \quad \forall z \in \mathcal{Z}.$$

By using (7) and (9), this last condition is exactly the defining inequality for  $p$  in the CRM algorithm:

$$\begin{cases} \sum_{a \in \mathcal{A}} [\bar{R}_{n-1}^\alpha(a)]_+ (f(a) - \sum_{a' \in \mathcal{A}} p(a') f(a') - \alpha) \leq 0, & \forall z = (f, 1) \in \mathcal{Z}, \\ [\bar{L}_{n-1}]_+ (\sum_{a' \in \mathcal{A}} p(a') f(a') - \gamma) \leq 0, & \forall z = (f, -1) \in \mathcal{Z}, \end{cases} \quad (10)$$

Finally we note that, whenever  $\sum_{a \in \mathcal{A}} [\bar{R}_{n-1}^\alpha(a)]_+ > 0$ , this  $p$  can be found by solving

$$\begin{aligned} & \min_{p \in B_n} \max_{f \in [0,1]^m} \sum_{a \in \mathcal{A}} f(a) \left( [\bar{R}_{n-1}^\alpha(a)]_+ - p(a) \right) / \sum_{a' \in \mathcal{A}} [\bar{R}_{n-1}^\alpha(a')]_+ \\ &= \min_{p \in B_n} \max_{f \in [0,1]^m} \sum_{a \in \mathcal{A}} f(a) (p_n^\alpha(a) - p(a)) \\ &= \min_{p \in B_n} \sum_{a \in \mathcal{A} : p_n^\alpha(a) > p(a)} (p_n^\alpha(a) - p(a)), \end{aligned}$$

where

$$B_n \triangleq \left\{ p \in \Delta(\mathcal{A}) : [\bar{L}_{n-1}]_+ \left( \sum_{a' \in \mathcal{A}} p(a') f(a') - \gamma \right) \leq 0, \quad \forall z = (f, -1) \in \mathcal{Z} \right\}$$

and

$$p_n^\alpha(a) = \frac{[\bar{R}_{n-1}^\alpha(a)]_+}{\sum_{a' \in \mathcal{A}} [\bar{R}_{n-1}^\alpha(a')]_+}$$

is the  $\alpha$ -regret matching strategy.

### 3 Adaptive Relaxation

Given a feasible  $\alpha \geq \alpha^*$ , the CRM algorithm attains the SR-BE  $r_\alpha^{\text{SR}}$ . However, in practice, it may be possible to attain  $r_\alpha^{\text{SR}}$  with  $\alpha < \alpha^*$  if the opponent is not entirely adversarial. In order to capitalize on this possibility, we propose to use an adaptive algorithm that adjusts the value of  $\alpha$  online. The idea is to start from some small initial value  $\alpha_0 \geq 0$  (possibly  $\alpha_0 = 0$ ). At each time step  $n$ , we would like to use a parameter  $\alpha = \alpha_n$  for which inequality (10) can be satisfied. We remind that this inequality is always satisfied when  $\alpha \geq \alpha^*$ . If however  $\alpha < \alpha^*$ , the inequality may or may not be satisfied. In the latter case, we increase  $\alpha$  so that the condition is satisfied. We propose two possibilities for the approximate adaptive search for parameter  $\alpha$ , using an approximation parameter  $\epsilon > 0$ . Let  $\alpha_n$  be the relaxation parameter that is used at stage  $n$ . (i) *Discretization*. Each time inequality (10) can not be satisfied, find the minimal integer  $K \geq 1$  such that for  $\alpha_n = \alpha_{n-1} + K\epsilon$  there exists a mixed action  $p \in \Delta(\mathcal{A})$  required by (10). (ii) *Binary search*. Set  $\alpha_b$  large enough, so that  $\alpha_b > \alpha^*$ , and use a binary search on the interval  $[\alpha_{n-1}, \alpha_b]$  to obtain  $\alpha_n$  such that (10) can be satisfied for it, while it can not be satisfied for  $\alpha_n - \epsilon$ .

The next theorem ensures that the adaptive CRM algorithm attains  $r_\alpha^{\text{SR}}$  with  $\alpha \leq \alpha^* + \epsilon$ , where  $\epsilon > 0$  is the discretization parameter. Moreover, the theorem provides the convergence rate of this algorithm.

**Theorem 3.1.** *Suppose that the adaptive CRM algorithm uses an  $\epsilon > 0$  to discretize the values of  $\alpha$ . Let<sup>1</sup>  $\alpha_\infty \triangleq \limsup_{n \rightarrow \infty} \alpha_n \leq \alpha^* + \epsilon$  denote the posterior relaxation parameter that the algorithm uses in the long term. Then, the algorithm attains  $r_{\alpha_\infty}^{\text{SR}}$ . In particular, for every  $\delta > 0$  and  $\eta > 0$ , there exists  $T > 0$  such that*

$$\mathbb{P} \left\{ \bar{r}_n \geq r_{\alpha_\infty}^{\text{SR}}(\bar{q}_n) - \delta \text{ and } d(\bar{c}_n, \Gamma) \leq \delta \right\} \geq 1 - \eta, \quad \forall n \geq T,$$

for any strategy of the opponent, where

$$T = \frac{8C^2}{\delta^4} \ln \frac{1}{\eta} + \frac{C}{\delta^2}$$

and  $C = 16(|\mathcal{A}| + 1)$ .

Note that  $T$  does not depend explicitly on the discretization parameter  $\epsilon$ . However, this parameter controls the precision of the approximate adaptive search. Therefore, the smaller is  $\epsilon$ , the better is the precision, and the longer it takes to perform the search. Finally, note that the adaptive CRM algorithm does not require the computation of the optimal  $\alpha^*$ , as it discovers it online.

*Proof.* We follow the proof of Theorem 5.1 and modify the convergence proof of the approachability algorithm for our adaptive case. Let

$$m_k^{\alpha_n} \triangleq (\{R_k^{\alpha_n}(a)\}_{a \in \mathcal{A}}, L_k) \in \mathbb{R}^{|\mathcal{A}|+1}.$$

---

<sup>1</sup>We note that  $\alpha_\infty$  is a random variable.

denote the vector payoff at time  $k \leq n$ , using a relaxation parameter  $\alpha_n$ . The corresponding average vector payoff at time  $n$  is then

$$\bar{m}_n^{\alpha_n} = \left( \{ \bar{R}_n^{\alpha_n}(a) \}_{a \in \mathcal{A}}, \bar{L}_n \right).$$

As in the proof of Theorem 5.1,  $S$  denotes the non-positive orthant of  $\mathbb{R}^{|\mathcal{A}|+1}$ . Our goal is to show that

$$d(\bar{m}_n^{\alpha_\infty}, S) \rightarrow 0$$

as  $n \rightarrow \infty$ , almost surely. We proceed in the following stages.

**Stage 1.** Note that we surely have that

$$d(\bar{m}_n^{\alpha_n}, S) \geq d(\bar{m}_n^{\alpha_{n+1}}, S) \geq d(\bar{m}_n^{\alpha_\infty}, S), \quad \forall n \geq 1, \quad (11)$$

since we only increase the relaxation parameter in the course of the algorithm. Thus, it is sufficient to show that

$$d(\bar{m}_n^{\alpha_n}, S) \rightarrow 0$$

almost surely. We prove this in the next stage.

**Stage 2.** Indeed, let

$$X_n \triangleq [d(\bar{m}_n^{\alpha_n}, S)]^2 = \|\bar{m}_n^{\alpha_n} - P_S(\bar{m}_n^{\alpha_n})\|^2.$$

We show below that  $X_n$  almost surely converges to zero. Using the fact that

$$\bar{m}_n^{\alpha_n} = \frac{n-1}{n} \bar{m}_{n-1}^{\alpha_n} + \frac{1}{n} m_n^{\alpha_n},$$

we obtain

$$\begin{aligned} X_n &= \|\bar{m}_n^{\alpha_n} - P_S(\bar{m}_n^{\alpha_n})\|^2 \\ &\leq \|\bar{m}_n^{\alpha_n} - P_S(\bar{m}_{n-1}^{\alpha_n})\|^2 \\ &= \left\| \frac{n-1}{n} \bar{m}_{n-1}^{\alpha_n} + \frac{1}{n} m_n^{\alpha_n} - P_S(\bar{m}_{n-1}^{\alpha_n}) \right\|^2 \\ &= \left\| \frac{n-1}{n} (\bar{m}_{n-1}^{\alpha_n} - P_S(\bar{m}_{n-1}^{\alpha_n})) + \frac{1}{n} (m_n^{\alpha_n} - P_S(\bar{m}_{n-1}^{\alpha_n})) \right\|^2 \\ &= \left( \frac{n-1}{n} \right)^2 \|\bar{m}_{n-1}^{\alpha_n} - P_S(\bar{m}_{n-1}^{\alpha_n})\|^2 + \frac{1}{n^2} \|m_n^{\alpha_n} - P_S(\bar{m}_{n-1}^{\alpha_n})\|^2 \\ &\quad + 2 \frac{n-1}{n^2} (\bar{m}_{n-1}^{\alpha_n} - P_S(\bar{m}_{n-1}^{\alpha_n})) \cdot (m_n^{\alpha_n} - P_S(\bar{m}_{n-1}^{\alpha_n})) \\ &\leq \left( \frac{n-1}{n} \right)^2 \|\bar{m}_{n-1}^{\alpha_{n-1}} - P_S(\bar{m}_{n-1}^{\alpha_{n-1}})\|^2 + \frac{1}{n^2} \|m_n^{\alpha_n} - P_S(\bar{m}_{n-1}^{\alpha_n})\|^2 \\ &\quad + 2 \frac{n-1}{n^2} (\bar{m}_{n-1}^{\alpha_n} - P_S(\bar{m}_{n-1}^{\alpha_n})) \cdot (m_n^{\alpha_n} - P_S(\bar{m}_{n-1}^{\alpha_n})), \end{aligned}$$

where the last inequality follows by (11). Multiplying this inequality by  $n^2$  and rearranging yields

$$\begin{aligned} n^2 X_n - (n-1)^2 X_{n-1} &\leq \|m_n^{\alpha_n} - P_S(\bar{m}_{n-1}^{\alpha_n})\|^2 \\ &\quad + 2(n-1) (\bar{m}_{n-1}^{\alpha_n} - P_S(\bar{m}_{n-1}^{\alpha_n})) \cdot (m_n^{\alpha_n} - P_S(\bar{m}_{n-1}^{\alpha_n})) \\ &\leq C + 2(n-1) (\bar{m}_{n-1}^{\alpha_n} - P_S(\bar{m}_{n-1}^{\alpha_n})) \cdot (m_n^{\alpha_n} - P_S(\bar{m}_{n-1}^{\alpha_n})), \end{aligned} \quad (12)$$

where the last inequality follows since the vector payoff is bounded, implying that

$$\|m_n^{\alpha_n} - P_S(\bar{m}_{n-1}^{\alpha_n})\|^2 \leq C, \quad \forall n \geq 1,$$

for some constant  $C > 0$  (independent of  $n$ ).

An explicit expression for  $C$  can be easily obtained in terms of the corresponding bounds on the reward and cost functions. In our case, we have that  $r_{max} = 1$  and  $c_{max} = 1$ . Therefore, we have that

$$\begin{aligned} \|m_n^{\alpha_n} - P_S(\bar{m}_{n-1}^{\alpha_n})\|^2 &\leq (|\mathcal{A}| + 1) \max \{4(r_{max} + \alpha^*)^2, 4(c_{max} + \gamma)^2\} \\ &\leq 16(|\mathcal{A}| + 1) \triangleq C, \end{aligned} \quad (13)$$

where the second inequality follows since we have that  $\alpha^* \leq r_{max} = 1$  and  $\gamma \leq c_{max} = 1$ .

Summing both sides of inequality (12) for  $k = 1, \dots, n$ , the left-hand side telescopes to  $n^2 X_n$ . Therefore, we have that

$$X_n \leq \frac{C}{n} + \frac{2}{n} \sum_{k=1}^n \frac{k-1}{n} (\bar{m}_{k-1}^{\alpha_k} - P_S(\bar{m}_{k-1}^{\alpha_k})) \cdot (m_k^{\alpha_k} - P_S(\bar{m}_{k-1}^{\alpha_k}))$$

Now, recall that the mixed action  $p_k$  used by the algorithm at time  $k$  satisfies the separation condition

$$(\bar{m}_{k-1}^{\alpha_k} - P_S(\bar{m}_{k-1}^{\alpha_k})) \cdot (m^{\alpha_k}(p_k, z) - P_S(\bar{m}_{k-1}^{\alpha_k})) \leq 0, \quad \forall z \in \mathcal{Z},$$

where

$$m^{\alpha_k}(p, z) \triangleq \left( \{r(a, z) - r(p, z) - \alpha_k\}_{a \in \mathcal{A}}, \{c_i(p, q) - \gamma_i\}_{i=0}^\ell \right).$$

Hence, it follows that

$$\begin{aligned} X_n &\leq \frac{C}{n} + \frac{2}{n} \sum_{k=1}^n (\bar{m}_{k-1}^{\alpha_k} - P_S(\bar{m}_{k-1}^{\alpha_k})) \cdot (m_k^{\alpha_k} - m^{\alpha_k}(p_k, z_k)) \\ &\triangleq \frac{C}{n} + \frac{2}{n} \sum_{k=1}^n Y_k. \end{aligned} \quad (14)$$

To complete the proof, we show that  $\{Y_n\}$  is a bounded martingale difference sequence, implying that its average almost surely converges to zero. Indeed, by the payoff boundedness assumption, we have that

$$|Y_n| \leq C, \quad \forall n \geq 1.$$

Also, let  $\mathcal{F}_n \triangleq \sigma(a_1, z_1, \dots, a_n, z_n)$  denote the corresponding filtration. We then have that

$$\begin{aligned} \mathbb{E}[Y_n \mid \mathcal{F}_{n-1}] &= \mathbb{E}[(\bar{m}_{n-1}^{\alpha_n} - P_S(\bar{m}_{n-1}^{\alpha_n})) \cdot (m_n^{\alpha_n} - m^{\alpha_n}(p_n, z_n)) \mid \mathcal{F}_{n-1}] \\ &= (\bar{m}_{n-1}^{\alpha_n} - P_S(\bar{m}_{n-1}^{\alpha_n})) \cdot \mathbb{E}(m^{\alpha_n}(a_n, z_n) - m^{\alpha_n}(p_n, z_n) \mid \mathcal{F}_{n-1}) \\ &= 0. \end{aligned}$$

Thus,  $\{Y_n, \mathcal{F}_n\}$  is a bounded martingale difference sequence, and the claim follows.

**Stage 3.** Finally, we use the Hoeffding-Azuma inequality to obtain polynomial convergence rate. In particular, for any  $\delta > 0$ , it holds that

$$\begin{aligned} \mathbb{P}\{d(\bar{m}_n^{\alpha_\infty}, S) \leq \delta\} &\geq \mathbb{P}\{d(\bar{m}_n^{\alpha_n}, S) \leq \delta\} = \mathbb{P}\{X_n \leq \delta^2\} \\ &\geq \mathbb{P}\left\{\frac{C}{n} + \frac{2}{n} \sum_{k=1}^n Y_k \leq \delta^2\right\} \\ &= \mathbb{P}\left\{\sum_{k=1}^n Y_k \leq \left(\delta^2 - \frac{C}{n}\right) \frac{n}{2}\right\} \\ &\geq 1 - \exp\left(-\frac{[(\delta^2 - \frac{C}{n}) \frac{n}{2}]^2}{2nC^2}\right) \\ &\geq 1 - \exp\left(-\frac{\delta^4 n}{8C^2} + \frac{\delta^2}{8C}\right), \end{aligned}$$

where the first inequality follows by (11), the second inequality follows by (14), and the third inequality holds by the Hoeffding-Azuma inequality. For a given  $\eta > 0$ , we thus require

$$\exp\left(-\frac{\delta^4 n}{8C^2} + \frac{\delta^2}{8C}\right) \leq \eta,$$

which yields

$$n \geq \frac{8C^2}{\delta^4} \ln \frac{1}{\eta} + \frac{C}{\delta^2} \triangleq T$$

as required. This completes the proof of the Theorem.  $\square$

## 4 Computational Aspects

In this section we discuss the computational issues related to the program

$$\alpha^* \triangleq \max_{q \in \Delta(\mathcal{Z})} (\beta^*(q) - \beta_\gamma^*(q)). \quad (15)$$

where  $\beta^*$  and  $\beta_\gamma^*$  are given in (2) and (4), respectively.

We propose below possible methods for the approximate (offline) computation of  $\alpha^*$ . First note that we can write (15) as:

$$\alpha^* = \max_{a \in \mathcal{A}} \max_{q \in \Delta(\mathcal{Z})} \min_{p \in \Delta(\mathcal{A}): \beta_{fp}(q;p) \leq \gamma} (\beta_{tp}(q; a) - \beta_{tp}(q; p)),$$



where  $\beta_{tp}(q; p) \triangleq \sum_{a \in \mathcal{A}} p(a) \beta_{tp}(q; a)$  and  $\beta_{fp}(q; p) \triangleq \sum_{a \in \mathcal{A}} p(a) \beta_{fp}(q; a)$ . Now, the inner minimization problem (which is in fact a linear program) can be expressed using Lagrange multipliers  $\lambda \in \mathbb{R}_+^\ell$  as follows:

$$\begin{aligned} \min_{p \in \Delta(\mathcal{A}): \beta_{fp}(q; p) \leq \gamma} \{\beta_{tp}(q; a) - \beta_{tp}(q; p)\} &= \min_{p \in \Delta(\mathcal{A})} \sup_{\lambda \geq 0} \{\beta_{tp}(q; a) - \beta_{tp}(q; p) + \lambda (\beta_{fp}(q; p) - \gamma)\} \\ &= \sup_{\lambda \geq 0} \min_{p \in \Delta(\mathcal{A})} \{\beta_{tp}(q; a) - \beta_{tp}(q; p) + \lambda (\beta_{fp}(q; p) - \gamma)\} \\ &= \sup_{\lambda \geq 0} \min_{a' \in \mathcal{A}} \{\beta_{tp}(q; a) - \beta_{tp}(q; a') + \lambda (\beta_{fp}(q; a') - \gamma)\}, \end{aligned}$$

where the second equality holds due to the strong duality of the linear program, and the third equality follows since the argument of the minimization is a linear function of  $p$ . Thus, (15) takes the following form:

$$\alpha^* = \max_{a \in \mathcal{A}} \sup_{\lambda \geq 0} \max_{q \in \Delta(\mathcal{Z})} \min_{a' \in \mathcal{A}} \{\beta_{tp}(q; a) - \beta_{tp}(q; a') + \lambda (\beta_{fp}(q; a') - \gamma)\}. \quad (16)$$

We note that the resulting maximization problem over  $\lambda$  (or over  $q$ , if we exchange the max with sup) is not convex in general and therefore may lack efficient algorithms for its solution. Below we propose two solution approaches.

Observe that the inner term

$$\max_{q \in \Delta(\mathcal{Z})} \min_{a' \in \mathcal{A}} \{\beta_{tp}(q; a) - \beta_{tp}(q; a') + \lambda (\beta_{fp}(q; a') - \gamma)\}$$

can be easily transformed into a standard linear programming problem as is usually done when computing a value of a repeated game. We are thus left with the maximization problem on  $\lambda \geq 0$ , which can be solved numerically, using discretization. Another possibility is to solve directly (16) which can be easily transformed into the following *bilinear* program:

$$\begin{aligned} &\max t \\ \text{s.t. } &\lambda \geq 0 \\ &q \in \Delta(\mathcal{Z}) \\ &\beta_{tp}(q; a) - \beta_{tp}(q; a') + \lambda (\beta_{fp}(q; a') - \gamma) \geq t, \quad \forall a' \in \mathcal{A}. \end{aligned}$$

This program should be solved for each  $a \in \mathcal{A}$ , and then the maximum should be taken. However, we are not aware of efficient algorithms for solving this program.

## 5 Approachability Theory

The approachability problem, introduced by Blackwell in [2], may be considered as a generalization of the basic online decision problem to *vector* rewards, taking values in  $\mathbb{R}^I$ . At each time step  $n = 1, 2, \dots$ , the agent selects his action  $a_n \in \mathcal{A}$ , observes the action

$z_n \in \mathcal{Z}$  chosen by the opponent, and obtains a *vector* reward  $m_n = m(a_n, z_n) \in \mathbb{R}^I$ . We denote by

$$\bar{m}_n \triangleq \frac{1}{n} \sum_{k=1}^n m_k$$

the average reward obtained by the player up to time  $n$ , as before.

In the approachability problem, we consider a set  $S \subseteq \mathbb{R}^I$ , and ask if there exists a policy for the player that will bring the average reward  $\bar{m}_n$  to  $S$  (asymptotically, almost surely) no matter what the opponent actions are. More formally, we have the following classical definition of approachable sets due to Blackwell [2].

**Definition 5.1** (Approachable Set). *Let  $S \subseteq \mathbb{R}^I$  be a closed set. The set  $S$  is approachable by the player if there exist a policy  $\pi$  such that  $d(\bar{m}_n, S) \rightarrow 0$  almost surely as  $n \rightarrow \infty$ , for any policy  $\sigma$  of the opponent. Here,  $\bar{r}_n$  is the average reward obtained using  $\pi$  up to time  $n$ , and  $d(\cdot, \cdot)$  is Euclidian distance.*

## 5.1 Approachability Theorem and Algorithms

Next, we present the original formulation of Blackwell's Theorem which provides us with necessary and sufficient conditions for approachability of *convex* sets. To this end, for any  $p \in \Delta(\mathcal{A})$  denote by  $C(p)$  the convex hull of the points  $\{m(p, z)\}_{z \in \mathcal{Z}}$ . Similarly, for any  $q \in \Delta(\mathcal{Z})$  denote by  $T(q)$  the convex hull of the points  $\{m(a, q)\}_{a \in \mathcal{A}}$ .

**Theorem 5.1.** *Let  $S$  be any closed convex set. Then, the following statements are equivalent:*

1.  $S$  is approachable.
2. For every  $q \in \Delta(\mathcal{Z})$  there exists  $p \in \Delta(\mathcal{A})$  such that  $m(p, q) \in S$ .
3. For every  $x \notin S$ , there exists  $p \in \Delta(\mathcal{A})$  such that

$$(x - P_S(x)) \cdot (m(p, z) - P_S(x)) \leq 0, \quad \forall z \in \mathcal{Z},$$

where  $P_S(x)$  is the projection of  $x$  to  $S$  in the Euclidean distance.

Below we state a corollary to this theorem, which is a simple manipulation of condition (3) above.

**Corollary 5.1.** *A closed convex set  $S$  is approachable if and only if for every  $u \in \mathbb{R}^I$  there exists  $p \in \Delta(\mathcal{A})$  such that*

$$u \cdot m(p, z) \leq w(u) \triangleq \sup \{u \cdot y : y \in S\}, \quad \forall z \in \mathcal{Z}.$$

In case of a general set  $S$ , Blackwell showed in [2] that in fact conditions 2 and 3 of Theorem 5.1 are, respectively, a necessary and a sufficient condition for approachability.

**Theorem 5.2.** *Let  $S \subseteq \mathbb{R}^I$  be a given closed set.*

1. *If condition 3 of Theorem 5.1 holds, then  $S$  is approachable.*
2. *If  $S$  is approachable, then condition 2 of Theorem 5.1 holds.*

Recently, Spinat in [6] proved a necessary and sufficient condition for approachability of general sets.

**Theorem 5.3.** *A closed set  $S$  is approachable if and only if it contains a set which satisfies condition 3 of Theorem 5.1.*

In fact, this Theorem suggests that the study of approachability should focus on the sets which satisfy condition 3 of Theorem 5.1, the so-called *B-sets*. This is true since, by this Theorem, any approachability algorithm for B-sets is also the approachability algorithm for any approachable set.

Approachability algorithms (i.e. algorithms that actually approach a given approachable closed set  $S$ ) require that condition 3 of Theorem 5.1 be satisfied for  $S$ . Thus, they are applicable to convex sets or, more generally, to B-sets. The first such algorithm is directly based on Blackwell's theorem, in particular on condition (3), and is presented as Algorithm 1. See Figure 1 for geometric interpretation of this algorithm.

---

**Algorithm 1** Blackwell's Approachability Algorithm

---

1. If  $\bar{m}_{n-1} \in S$ , then choose arbitrary action  $a_n$ .
2. If  $\bar{m}_{n-1} \notin S$ , use a mixed action  $p_n \in \Delta(\mathcal{A})$ , such that

$$u \cdot m(p_n, z) \leq w(u), \forall z \in \mathcal{Z},$$

where  $u = u(\bar{m}_{n-1}) \triangleq \bar{m}_{n-1} - P_S(\bar{m}_{n-1})$ . Such a  $p_n$  exists by Corollary 5.1.

---

Note that Blackwell's algorithm uses a function  $u : \mathbb{R}^I \setminus S \rightarrow \mathbb{R}^I$  to define the approachability direction, where  $u(x)$  is the vector starting from the closest point  $s \in S$  to  $x$ , and ending in  $x$ . Hart and Mas-Colell [4] proposed a more general class of approachability algorithms, by introducing a general class of directional mappings  $u$ , with the certain regularity properties.

## 5.2 Blackwell's Approachability Formulation of Regret Minimization

One of the first applications of approachability theory was proposed by Blackwell in [1]. In this work, the regret minimization problem was formulated as a special case of the approachability problem to a corresponding *convex* set. In particular, the following game with vector-valued rewards was defined in [1]. Recall that, at time  $n$ , the agent chooses

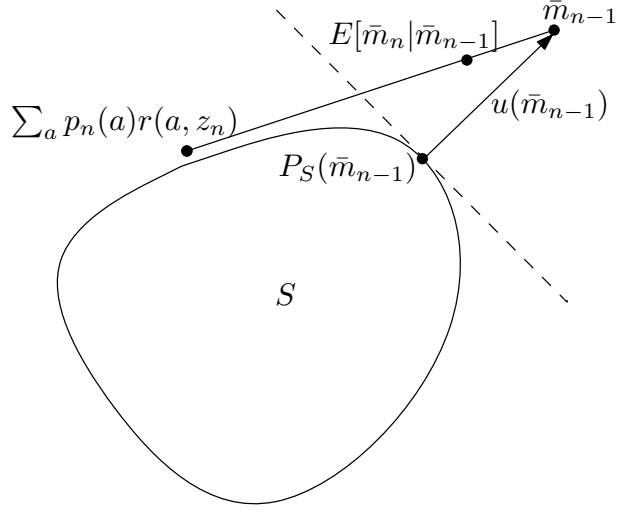

Figure 1: Geometric Interpretation of Approachability

$a_n$ , the opponent chooses  $z_n$ , the agent obtains  $r_n = r(a_n, z_n) \in \mathbb{R}$ . Now, the vector-valued reward at time  $n$ ,  $m_n \in \mathbb{R} \times \Delta(\mathcal{Z})$ , is defined as  $m_n = (r_n, \mathbf{1}(z_n))$ , where  $\mathbf{1}(z)$  is the probability distribution concentrated on  $z$ . Note that the average reward for this game is

$$\bar{m}_n \triangleq \frac{1}{n} \sum_{k=1}^n m_k = (\bar{r}_n, \bar{q}_n).$$

Finally, let

$$S = \{(r, q) \in \mathbb{R} \times \Delta(\mathcal{Z}) : r \geq r^*(q)\},$$

where  $r^*$  is the best-response envelope (BE). It is easy to see that  $S$  is convex approachable set, implying that Blackwell's algorithm can be used to approach it. Therefore, Blackwell's algorithm for this set is a no-regret algorithm for the original regret minimization problem. We note that this algorithm is implicit in the sense that it requires a computation of the projection  $P_S$ , and the complexity of this computation depends on the structure of the set  $S$ .

An extension of Blackwell's formulation to the constrained setting was proposed in [5]. In particular, instantaneous cost  $c_n$  was included in the vector-valued reward, that is

$$\bar{m}_n = (\bar{r}_n, \bar{c}_n, \bar{q}_n) \in \mathbb{R}^{1+\ell} \times \Delta(\mathcal{Z}).$$

Accordingly, the set  $S$  is defined as:

$$S = \{(r, c, q) \in \mathbb{R}^{1+\ell} \times \Delta(\mathcal{Z}) : r \geq r_\Gamma^*(q), c \in \Gamma\},$$

where  $r_\Gamma^*$  is the constrained best-response envelope CBE. In this case,  $S$  is *non-convex* since  $r_\Gamma^*$  is non-convex function. Moreover, it was shown in [5] that it is not approachable in general, implying that  $r_\Gamma^*$  need not be attainable. However, the *convex hull*  $\text{conv}(r_\Gamma^*)$  of  $r_\Gamma^*$  was shown to be attainable.

### 5.3 Regret Matching

An alternative vector-valued game formulation for the regret minimization problem was proposed by Hart and Mas-Colell in [3]. Let

$$R_k(a) \triangleq r(a, z_k) - r_k, \quad a \in \mathcal{A},$$

denote the *instantaneous regret* at time  $k$ . The average regret at time  $n$  is then

$$\bar{R}_n(a) = r(a, \bar{q}_n) - \bar{r}_n,$$

Now consider the following vector-valued payoff of the agent at time  $n$ :

$$m_n \triangleq \{R_n(a)\}_{a \in \mathcal{A}} \in \mathbb{R}^{|\mathcal{A}|}.$$

The average vector-valued payoff at time  $n$  is then

$$\bar{m}_n = \{\bar{R}_n(a)\}_{a \in \mathcal{A}}.$$

Finally, define

$$S = \mathbb{R}_-^{|\mathcal{A}|} \triangleq \{u \in \mathbb{R}^{|\mathcal{A}|} : u \leq 0\},$$

which is the non positive orthant of  $\mathbb{R}^{|\mathcal{A}|}$ .  $S$  is a convex set, and it can be easily proved (using Theorem 5.1) that it is approachable by the agent. The advantage of this formulation is the fact that the corresponding no-regret algorithm is a simple *regret matching* strategy  $p_n$ , which is given by:

$$p_n(a) = \frac{[\bar{R}_{n-1}(a)]_+}{\sum_{a' \in \mathcal{A}} [\bar{R}_{n-1}(a')]_+}.$$

That is,  $p_n$  prescribes to play according to probabilities that are proportional to the (positive) regrets. In fact, a whole class of such no-regret algorithms was proposed in [4] based on a general class of approachability direction mappings.

## References

- [1] D. Blackwell. Controlled random walks. In *Proceedings of the International Congress of Mathematicians*, volume III, pages 335–338, 1954.
- [2] D. Blackwell. An analog of the minimax theorem for vector payoffs. *Pacific Journal of Mathematics*, 6:1–8, 1956.
- [3] S. Hart and A. Mas-Colell. A simple adaptive procedure leading to correlated equilibrium. *Econometrica*, 68:1127–1150, 2000.
- [4] S. Hart and A. Mas-Colell. A general class of adaptive strategies. *Journal of Economic Theory*, 98:26–54, 2001.

- [5] S. Mannor, J. N. Tsitsiklis, and J. Y. Yu. Online learning with sample path constraints. *Journal of Machine Learning Research*, 10:569–590, 2009.
- [6] X. Spinat. A necessary and sufficient condition for approachability. *Mathematics of Operations Research*, 27(1):31–44, 2002.
