# Supplementary material
Source: ML conference proceedings conference paper supplement (https://proceedings.neurips.cc/paper_files/paper/2010/hash/9cfdf10e8fc047a44b08ed031e1f0ed1-Abstract.html)
Supplement: Supplementary file 2 [file 9cfdf10e8fc047a44b08ed031e1f0ed1-Supplemental.zip]

Archive with 1 entries (1 files):
- extra/NIPS2010_0226_extra.pdf
